# Supplementary material for: Age, adrenal steroids, and cognitive functioning in captive chimpanzees ( Pan troglodytes )
Source: PeerJ journal article supplement (doi:10.7717/peerj.14323), 2022-11-09

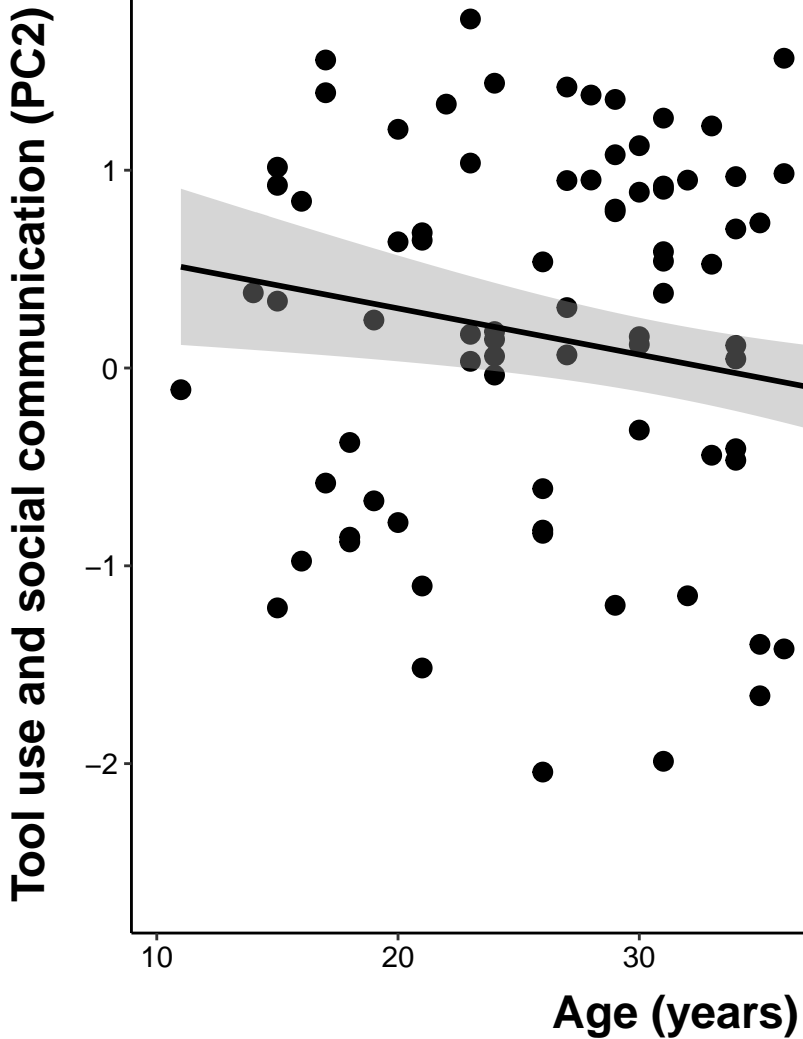

Supplement: Fig.S2.pdf [file Fig.S2.pdf]
